# Supplementary material
Source: publisher figshare collection journal article supplement (https://gsapubs.figshare.com/ndownloader/files/23300015)
Supplement: Supplementary file 1 [file 23300015]

# **A 2000 year rupture history for the Alpine Fault derived from Lake Ellery, South Island New Zealand.**

## *Authors*

Jamie D. Howarth<sup>1,2,\*</sup>, Sean J. Fitzsimons<sup>2</sup>, Richard J. Norris<sup>3</sup>, Robert Langridge<sup>1</sup> and Marcus J. Vandergoes<sup>1</sup>

<sup>1</sup>*GNS Science, PO Box 30-368, Lower Hutt, New Zealand*

<sup>2</sup>*Department of Geography, University of Otago, PO Box 56, Dunedin, New Zealand*

<sup>3</sup>*Department of Geology, University of Otago, PO Box 56, Dunedin, New Zealand*

*\* Correspondence to: Jamie Howarth*

*Address: Department of Active Landscapes, GNS Science, PO  
Box 30-368, Lower Hutt, New Zealand*

*Ph: +64 4 570 4228*

*Email: j.howarth@gns.cri.nz*

## **Supplementary information:**

**Supplementary methods**

**Suplimentary note**

**Suplimentary Figure 1**

**Suplimentary Figure 2**

**Suplimentary Figure 3**

**Suplimentary Table 1**

**Suplimentary Table 2**

### Supplementary methods:

Grainsize analysis was conducted on deposits that were traceable across multiple cores from within the lake basin. These deposits were sub-sampled at 10 mm resolution and treated with 5 ml of 30% H<sub>2</sub>O<sub>2</sub> at 50 °C for 12 hours and by adding 10 ml of 1 M NaOH to the samples and heating them to 50 °C for 4 hours to remove organic matter and biogenic silica respectively. Samples were then shaken for 30 min, before they were reheated to 50 °C for a further 30 min. The samples were then treated with 5 ml of 5% sodium hexametaphosphate solution and shaken gently for two hours to deflocculate clay-sized particles before analysis. After deflocculation grainsize was analysed on a Malvern Mastersizer 2000G laser diffraction particle size analyser coupled to a HydroG dispersion unit.

Core EL1 was sampled at 10 mm intervals to determine total organic carbon (TOC) and total nitrogen (TN). Individual 10 mm slices of core were sampled from a quarter of the core using a scalpel and 3 mm of material was removed from the margins of each sample to avoid sediment that was in contact with the core liner. Samples were covered in aluminium foil to prevent contamination and then air dried at 36 °C for 48 hours. Dried samples were homogenised using a mortar and pestle and stored in polypropylene test tubes until analysed. The presence or absence of inorganic carbon was determined by treating a subset of samples taken at 100 mm intervals in the cores with 6 N HCL and observing them for an effervescent reaction. None of the samples effervesced so the samples were deemed not to need pre-treatment to remove inorganic carbon and total carbon was regarded as equivalent to TOC. In the absence of carbonates the decision not to pre-treat the samples with acid was conservative considering that recent studies have demonstrated substantial non-linear variation in organic C and N concentrations caused by acid pre-treatment (Brodie *et al.*, 2011; Fernandes and Krull, 2008).

Three hundred milligrams of sample was analysed using a Verio Max elemental analyser running in C/N mode. The Verio Max elemental analyser combusted samples at 900 °C in the presence of an oxygen atmosphere. After combustion carbon and nitrogen compounds were reduced to CO<sub>2</sub> and N<sub>2</sub> using a copper oxide reduction column and the amounts of these gasses counted by a thermal conductivity detector (TCD). Raw counts for C and N were converted to weight percent using a conversion factor derived from glutamic acid standards (N = 9.52±0.05%, C = 40.78±0.2%). Procedural blanks demonstrated that contamination from C and N during the preparation procedure was minimal but present and all sample C and N values were corrected for average procedural blanks (n = 20). The precision of results was assessed by measuring duplicate samples every 200 mm down core EL1 and is reported as the average difference between replicates, which is ±0.001%

The core density and TOC data were used to calculate mass of clastic sediment ( $M_{cs}$ ) in core EL1 using the methods outlined in Howarth et al. (2012). The mass of clastic sediment ( $M_{cs}$ ) in 10 mm sections of core EL1 was determined by multiplying core volume by the dry density of clastic sediment. The dry density of clastic sediment was calculated using equation S1:

$$M_{cs} = \left( \frac{M_{wet}}{\left(1 + \frac{W}{100}\right)} \right) - \left( \left( \frac{M_{wet}}{\left(1 + \frac{W}{100}\right)} \right) \times \left( \frac{F(TOC)}{100} \right) \right) \quad (S1)$$

where  $M_{wet}$  is the wet mass of the sediment in a 1 cm slice of core (g),  $W$  is weight percentage water content (%), TOC is total organic carbon (%) and  $F$  is the Van Bemmelen factor of 1.724 for converting weight percent TOC to weight percent organic matter.

#### References:

- Berryman, K., Cooper, A., Norris, R., Villamor, P., Sutherland, R., Wright, T., Schermer, E., Langridge, R., and Biasi, G., 2012b, Late Holocene rupture history of the Alpine Fault in South Westland, New Zealand. *Bulletin of the Seismological Society of America*, v. 102, p. 620-638.
- Brodie, C. R., Leng, M. J., Casford, J. S. L., Kendrick, C. P., Lloyd, J. M., Yongqiang, Z. and Bird, M. I., 2011, Evidence for bias in C and N concentrations and  $\delta^{13}C$  composition of terrestrial and aquatic organic materials due to pre-analysis acid preparation methods. *Chemical Geology*, v. 282, p. 67-83.
- Bronk Ramsey, C., and Lee, S., 2013, Recent and Planned Developments of the Program OxCal. *Radiocarbon*, v. 55, p. 720-730.
- Fernandes, M. and Krull, E., 2008, How does acid treatment to remove carbonates affect the isotopic and elemental composition of soils and sediments? *Environmental Chemistry*, v. 5, p. 33-39.
- Howarth, J. D., Fitzsimons, S. J., Norris, R. J., and Jacobsen, G. E., 2012, Lake sediments record cycles of sediment driven by large earthquakes on the Alpine Fault, New Zealand. *Geology*, v. 40, p. 1091-1094.
- Howarth, J. D., Fitzsimons, S. J., Norris, R. J., and Jacobsen, G. E. 2014, Lake Sediments record high intensity shaking that provides insight into the location and rupture length of large earthquakes on the Alpine Fault, New Zealand. *Earth and Planetary Science Letters*, v. 403, 340-351.

**Supplementary note:** OxCal 4.2 code for the revised Haast, Okuru and Turnbull trench chronology. In this prior model each trench is represented individually but the event horizons (EH) are tied.

```
Options()
{
  Curve="ShCal13.14c";
};
Plot()
{
  Sequence("Haast_South")
  {
    Boundary("Base of section");
    Date("=EH3");
    R_Date("5p", 900, 57);
    Date("=EH2");
    R_Date("4i", 625, 57);
    Date("=EH1");
    C_Date("Historic period", 1840, 2);
    Boundary("Top of sections");
  };
  Sequence("Okuru_North")
  {
    Boundary("Base of section");
    Date("EH3");
    Phase("5p")
    {
      R_Date("5p", 790, 60);
      R_Date("5p", 400, 120);
    };
    Date("EH2");
    R_Date("4w", 520, 160);
    Date("EH1");
    R_Date("3w", 258, 56);
    C_Date("Historic period", 1840, 2);
    Boundary("Top of sections");
  };
  Sequence("Okuru_South")
  {
    Boundary("Base of section");
    Date("=EH2");
    R_Date("4i", 660, 60);
    Date("=EH1");
    C_Date("Historic period", 1840, 2);
    Boundary("Top of sections");
  };
  Sequence("Turnbull")
  {
    Boundary("Base of section");
    Phase("6p")
    {
      R_Date("Wk8122", 1410, 50);
      R_Date("Wk8301", 1390, 60);
      R_Date("Wk8123", 1000, 50);
    };
    Date("=EH3");
    Phase("5p")
    {
      R_Date("11498", 1083, 60);
    };
    Date("=EH2");
    C_Date("Historic period", 1840, 2);
    Boundary("Top of sections");
  };
};
```

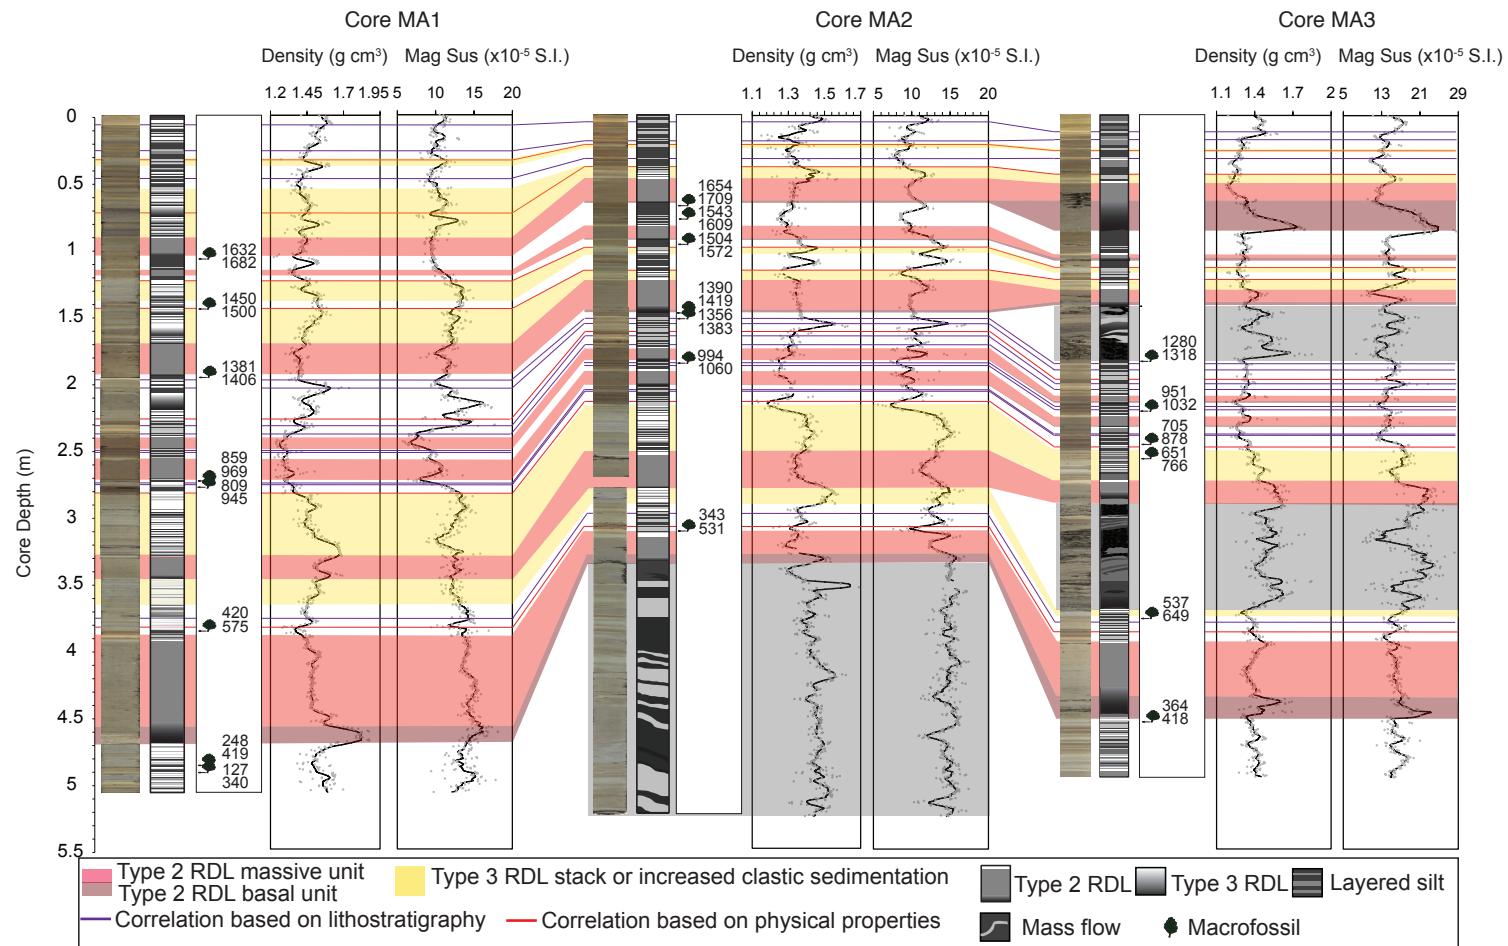

Figure S1: Summary of the sedimentary record from Lake Mapourika extended from that presented by Howarth et al. (2014), containing digital images, graphic logs, terrestrial macrofossil 95% highest probability density age ranges, gamma density and magnetic susceptibility for cores MA1 (left) from the southern sub-basin and, cores MA2 (centre) and MA3 (right) from the northern sub-basin of Lake Mapourika. Dark red and red shading shows the geometry of the thinning basinward basal units and the basinward thickening homogenous units of type 2 RDLs, respectively. These units can be correlated across the basin. Yellow shading shows type 3 RDL stacks and increases in clastic sedimentation that correlate across the sub-basins. Purple and red horizontal lines represent core to core correlations based on lithostratigraphy and physical properties, respectively.

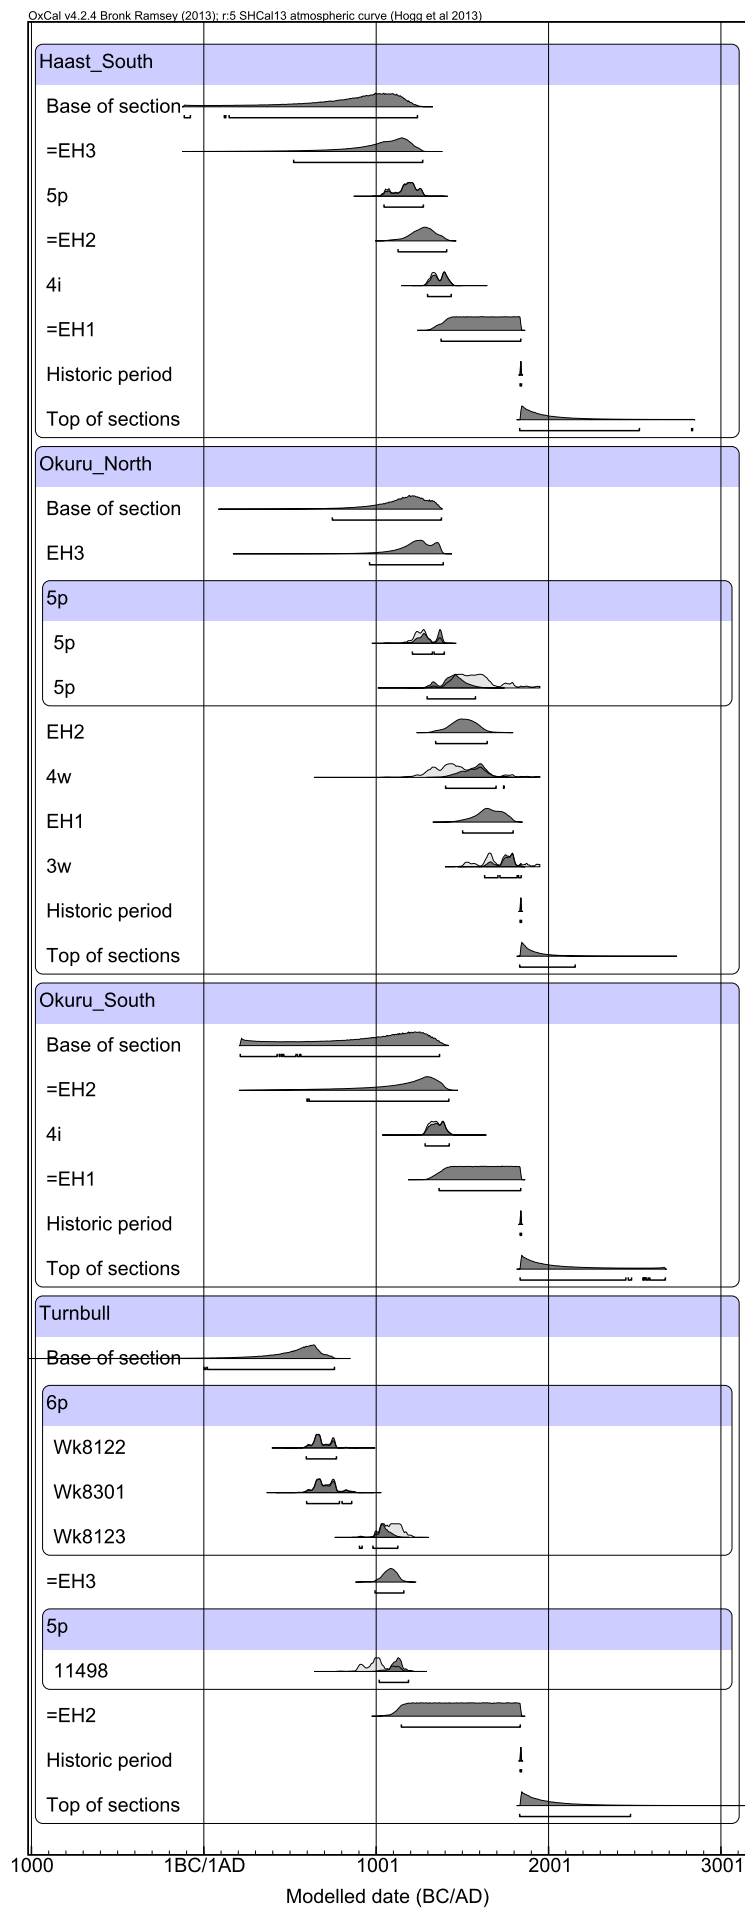

Figure S2: Revised age model for the Haast trench sites produced in OxCal 4.2 (Bronk Ramsey and Lee, 2013).

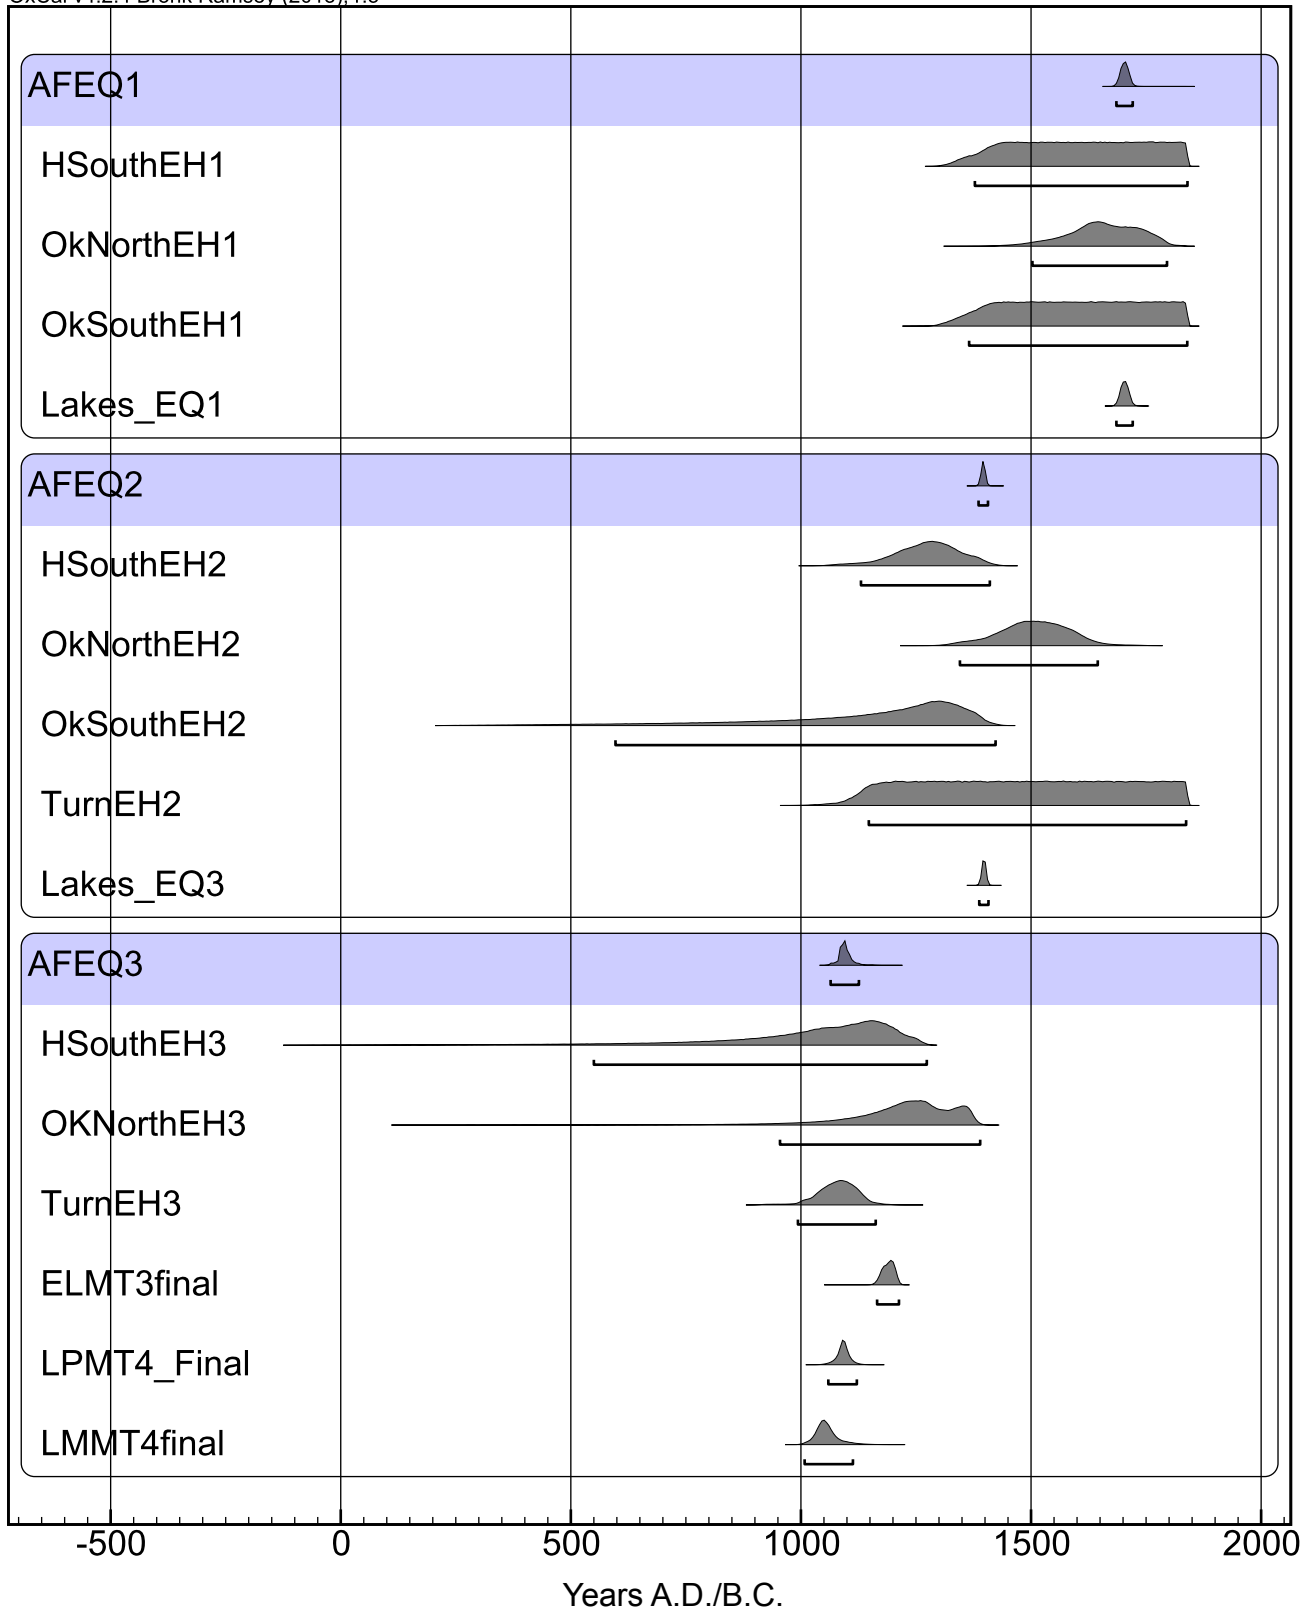

Figure S3: Comparison of event sequence age PDFs for the last three earthquakes from the Haast, Okuru and Turnbull trenches as well as the lake Ellery, Paringa and Mapourika records (Berryman et al., 2012b; this study). Bars represent the 95% highest probability density function range. AFEQ – Alpine Fault earthquakes; EH – event sequence; Hsouth – Haast River South Trench; OkNorth – Okuru River North Trench; OkSouth – Okuru River South Trench; and Turn – Turnbull River Trench.

Table S1: Summary information for conventional radiocarbon ages (CRAs) from Lake Ellery.

| Lab code  | RDL*<br>normalised<br>depth (cm) | Macrofossil type                           | $\delta^{13}\text{C}$<br>(‰) | $^{14}\text{C}$ age<br>(yr BP) | 95% modelled<br>age HPDF<br>(A.D.) |
|-----------|----------------------------------|--------------------------------------------|------------------------------|--------------------------------|------------------------------------|
| NZA 51739 | 19.5                             | Unknown leaf                               | -27.2±0.2                    | 138±20                         | 1950-1696                          |
| NZA 51877 | 21.4                             | Unknown seed                               | -26.2±0.2                    | 166±20                         | 1950-1675                          |
| NZA 51737 | 43.8                             | W. racemosa leaf                           | -24.8±0.2                    | 229±20                         | 1802-1654                          |
| NZA 51783 | 46.0                             | Unknown leaf                               | -28.4±0.2                    | 353±21                         | 1641-1499                          |
| NZA 51803 | 54                               | N. menzesii leaf                           | -29.9±0.2                    | 351±20                         | 1641-1498                          |
| NZA 51804 | 58.5                             | N. menzesii leaf                           | -30.0±0.2                    | 437±20                         | 1613-1447                          |
| NZA 51805 | 60.8                             | W. racemosa leaf                           | -27.6±0.2                    | 449±20                         | 1610-1442                          |
| NZA 51806 | 68.1                             | N. menzesii leaf                           | -29.6±0.2                    | 699±24                         | 1416-1320                          |
| NZA51866  | 74.3                             | D. cupressinum leaf                        | -29.4±0.2                    | 613±20                         | 1391-1286                          |
| NZA 51874 | 80.8                             | N. menzesii leaf                           | -31.1±0.2                    | 776±20                         | 1297-1229                          |
| NZA 51876 | 84.3                             | W. racemosa leaf                           | -29.0±0.2                    | 844±20                         | 1275-1209                          |
| NZA 51910 | 88.9                             | N. menzesii leaf                           | -28.8±0.2                    | 931±19                         | 1218-1053                          |
| NZA 51829 | 92.9                             | N. menzesii leaf                           | -29.3±0.2                    | 922±20                         | 1214-1050                          |
| NZA 38101 | 96                               | N. menzesii leaf                           | -30.4±0.2                    | 988±24                         | 1154-1030                          |
| NZA 38106 | 101.2                            | N. menzesii leaf                           | -28.4±0.2                    | 1029±25                        | 1149-996                           |
| NZA 38100 | 107.4                            | N. menzesii leaf                           | -28.5±0.2                    | 1037±25                        | 1145-993                           |
| NZA 38099 | 110.5                            | N. menzesii leaf                           | -32.2±0.2                    | 1059±25                        | 1134-987                           |
| NZA 51830 | 114.1                            | N. menzesii leaf                           | -30.0±0.2                    | 1125±20                        | 1019-895                           |
| NZA 38104 | 118.1                            | N. menzesii leaf                           | -27.7±0.2                    | 1140±25                        | 1013-890                           |
| NZA 38105 | 120.6                            | N. menzesii leaf                           | -31.0±0.2                    | 1175±25                        | 986-883                            |
| NZA 51807 | 124.3                            | N. menzesii leaf and a<br>N. solandri leaf | -31.9±0.2                    | 1269±21                        | 884-691                            |
| NZA 38102 | 129.4                            | N. menzesii leaf                           | -28.4±0.2                    | 1352±25                        | 855-673                            |
| NZA 38103 | 131.2                            | N. menzesii leaf                           | -27.7±0.2                    | 1319±25                        | 768-663                            |
| NZA 51831 | 138.8                            | N. solandri leaf                           | -27.9±0.2                    | 1481±20                        | 650-588                            |
| NZA 51869 | 146.8                            | N. menzesii leaf                           | -29.8±0.2                    | 1523±21                        | 638-545                            |
| NZA 51896 | 150.5                            | N. solandri leaf                           | -29.6±0.2                    | 1630±20                        | 577-437                            |
| NZA 51895 | 153.3                            | N. menzesii leaf                           | -30.4±0.2                    | 1590±20                        | 531-417                            |
| NZA 51902 | 162.6                            | W. racemosa leaf                           | -31.1±0.2                    | 1689±20                        | 464-357                            |
| NZA 51894 | 173.4                            | N. menzesii leaf                           | -32.1±0.2                    | 1714±20                        | 420-258                            |
| NZA 51911 | 178.7                            | N. menzesii leaf                           | -30.0±0.2                    | 1801±20                        | 355-225                            |
| NZA 51898 | 184.0                            | N. solandri leaf                           | -27.8±0.2                    | 1825±20                        | 340-144                            |
| NZA 51906 | 191.1                            | N. menzesii leaf                           | -28.6±0.2                    | 1937±20                        | 226-114                            |
| NZA 51905 | 192.6                            | N. menzesii leaf                           | -28.8±0.2                    | 1896±20                        | 200-59                             |
| NZA 51904 | 196.9                            | N. menzesii leaf                           | -30.4±0.2                    | 1982±20                        | 118--37                            |
| NZA 51901 | 202.3                            | N. menzesii leaf                           | -29.9±0.2                    | 2098±20                        | 17--140                            |
| NZA 51899 | 208.8                            | N. menzesii leaf                           | -27.3±0.2                    | 2160±20                        | -66--341                           |

\*Core depth with rapidly deposited layers removed.



Table S2: Timing of subaqueous mass-wasting events in lakes Ellery, Paringa and Mapourika, durations of increased postseismic terrestrial sediment flux and mass accumulation rates.

| Event timing<br>(A.D./B.C.) | Timing of Event Sequence (A.D./B.C.) |                          |                          | $\chi^2$ Test P value | Duration of post-seismic sediment flux (yr) |         |           | Lake Ellery MAR<br>(g cm <sup>-1</sup> yr <sup>-2</sup> ) |              |
|-----------------------------|--------------------------------------|--------------------------|--------------------------|-----------------------|---------------------------------------------|---------|-----------|-----------------------------------------------------------|--------------|
|                             | Ellery                               | Paringa                  | Mapourika                |                       | Ellery                                      | Paringa | Mapourika | Postseismic                                               | Interseismic |
| 1726-1690                   | 1770-1680                            | 1744-1690*<br>1745-1690† | 1791-1657*<br>1734-1658‡ | <0.05                 | 32±17                                       | 78±14   | N/D       | 0.18±0.13                                                 | 0.07±0.02    |
| 1407 -1388                  | 1428-1362                            | 1408-1372*<br>1405-1374† | 1420-1388*<br>1422-1390‡ | <0.05                 | 60±18                                       | 39±8    | 50±12     | 0.09±0.05                                                 | 0.05±0.01    |
| 1213-1008                   | 1213-1165                            | 1122-1059*<br>1120-1064† | 1113-1008*<br>1090-1015‡ | >0.05                 | 23±14                                       | 72±12   | N/D       | 0.13±0.10                                                 | 0.08±0.03    |
| 1008 - 966                  | 1024-967                             | 1010-945*<br>N/D         | N/A<br>N/A               | <0.05                 | 19±12                                       | N/A     | N/D       | 0.2±0.16                                                  | 0.08±0.02    |
| 961 - 915                   | 991-915                              | 966-883*<br>965-887†     | 974-845*<br>977-869‡     | <0.05                 | 22±15                                       | 51±11   | N/D       | 0.13±0.11                                                 | 0.04±0.03    |
| 646 - 592                   | 645-584                              | N/A<br>N/A               | 671-571*<br>N/D          | <0.05                 | 29±17                                       | N/A     | N/D       | 0.13±0.10                                                 | 0.04±0.01    |
| 416 - 370                   | 430-329                              | N/A<br>N/A               | 420-364*<br>N/D          | <0.05                 | 22±14                                       | N/A     | N/D       | 0.64±0.51                                                 | 0.04±0.01    |
| 206 - 93                    | 206-93                               | N/A                      | N/A                      | N/A                   | 24±18                                       | N/A     | N/A       | 0.15±0.13                                                 | 0.7±0.03     |
| 20 - 150                    | 150-20                               | N/A                      | N/A                      | N/A                   | 16±15                                       | N/A     | N/A       | 0.14±0.14                                                 | 0.04±0.02    |
| Averages                    |                                      |                          |                          |                       | 27±5                                        | 58±7    |           | 0.19±0.07                                                 | 0.06±0.01    |

Notes:  
 Event sequence ages reported as 95% highest probability density function; Errors on durations and rates are reported to 1 standard error; N/A – not applicable;  
 N/D – no data; MAR – mass accumulation rate  
 \* ages determined from the P<sub>sequence</sub> age model with variable constant k  
 †ages from Howarth et al. (2012).  
 ‡ages from Howarth et al. (2014).
